# Supplementary material for: Recastable assemblies of carbon dots into mechanically robust macroscopic materials
Source: PubMed Central journal article supplement (PMC10600192; doi:10.1038/s41467-023-42516-8), 2023-10-25
Supplement: 41467_2023_42516_MOESM2_ESM.pdf [file 41467_2023_42516_MOESM2_ESM.pdf]

### **Description of Additional Supplementary Files**

File Name: Supplementary Movie 1

Description: Structure evolution of the CDs-0.89UPy films during the elongation process.

File Name: Supplementary Movie 2

Description: Structure evolution of the CDs-1.80UPy films during the elongation process.
